# Supplementary material for: Homoleptic and heteroleptic Au(i) complexes containing the new [Co5C(CO)12]− cluster as ligand
Source: Royal Society of Chemistry journal article supplement (doi:10.1039/c4dt00854e), 2014-01-01

## Supporting Information for

# Homoleptic and heteroleptic Au(I) complexes containing the new [Co<sub>5</sub>C(CO)<sub>12</sub>]<sup>-</sup> cluster as ligand

Marco Bortoluzzi,<sup>[a]</sup> Iacopo Ciabatti,<sup>[b]</sup> Cristina Femoni,<sup>[b]</sup> Tiziana Funaioli,<sup>[c]</sup> Mohammad Hayatifar,<sup>[b]</sup> Maria Carmela Iapalucci,<sup>[b]</sup> Giuliano Longoni,<sup>[b]</sup> and Stefano Zacchini<sup>[b]\*</sup>

<sup>[a]</sup> *Dipartimento di Scienze Molecolari e Nanosistemi, Ca' Foscari University of Venice, Dorsoduro  
2137 – 30123 Venezia, Italy*

<sup>[b]</sup> *Dipartimento di Chimica Industriale "Toso Montanari", Università di Bologna, Viale  
Risorgimento 4 - 40136 Bologna, Italy. Fax: +39 0512093690, E-mail: [stefano.zacchini@unibo.it](mailto:stefano.zacchini@unibo.it)*

<sup>[c]</sup> *Dipartimento di Chimica e Chimica Industriale, University of Pisa, Via Risorgimento 35, 56126  
Pisa, Italy.*

**Figure S.1**

Cyclic (green, black and red) and hydrodynamic (blue) voltammograms recorded at a platinum electrode in a  $\text{CH}_2\text{Cl}_2$  solution of  $[\{\text{Co}_5\text{C}(\text{CO})_{12}\}_2\text{Au}]^-$ ,  $[\mathbf{2}]^-$ .  $[\text{N}^n\text{Bu}_4][\text{PF}_6]$  ( $0.2 \text{ mol dm}^{-3}$ ) as supporting electrolyte. Scan rates:  $0.1 \text{ V s}^{-1}$ .

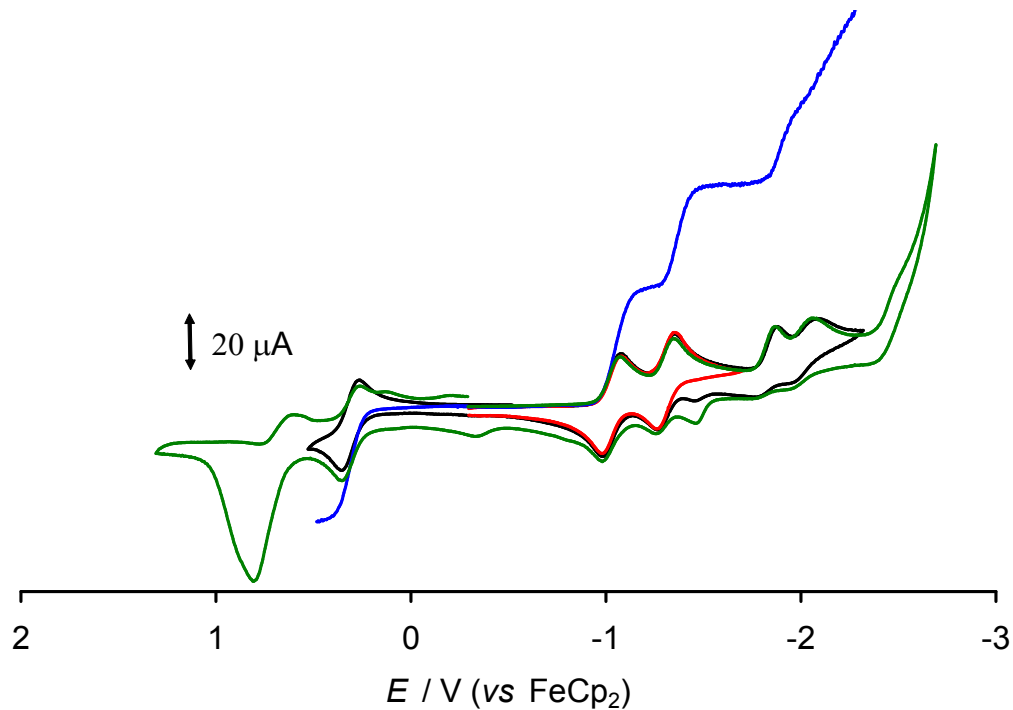

**Table S.1**

$\nu(\text{CO})$  stretching frequencies ( $\text{cm}^{-1}$ ) of  $[\mathbf{2}]^{n-}$  ( $n = 0-3$ ) as obtained from spectroelectrochemical experiments in  $\text{CH}_2\text{Cl}_2$  solution.

|                                       |                                     |
|---------------------------------------|-------------------------------------|
| <b>2</b>                              | 2062(s), 2047(s), 1872(m)           |
| <b><math>[\mathbf{2}]^-</math></b>    | 2060(m), 2043(s), 2012(m), 1856(m)  |
| <b><math>[\mathbf{2}]^{2-}</math></b> | 2027(s), 1982(m), 1838(sh), 1814(m) |
| <b><math>[\mathbf{2}]^{3-}</math></b> | 1993(s), 1957(m), 1787(m)           |

**Figure S.2**

Selected IR spectra recorded in a OTTLE cell during the electrolysis of  $[\{\text{Co}_5\text{C}(\text{CO})_{12}\}_2\text{Au}]^-$ , in  $\text{CH}_2\text{Cl}_2$  solution containing  $[\text{N}^n\text{Bu}_4][\text{PF}_6]$   $0.2 \text{ mol dm}^{-3}$  as the supporting electrolyte, and corresponding to the different charged clusters  $[\{\text{Co}_5\text{C}(\text{CO})_{12}\}_2\text{Au}]/[\{\text{Co}_5\text{C}(\text{CO})_{12}\}_2\text{Au}]^-$   $/[\{\text{Co}_5\text{C}(\text{CO})_{12}\}_2\text{Au}]^{2-}/[\{\text{Co}_5\text{C}(\text{CO})_{12}\}_2\text{Au}]^{3-}$ .

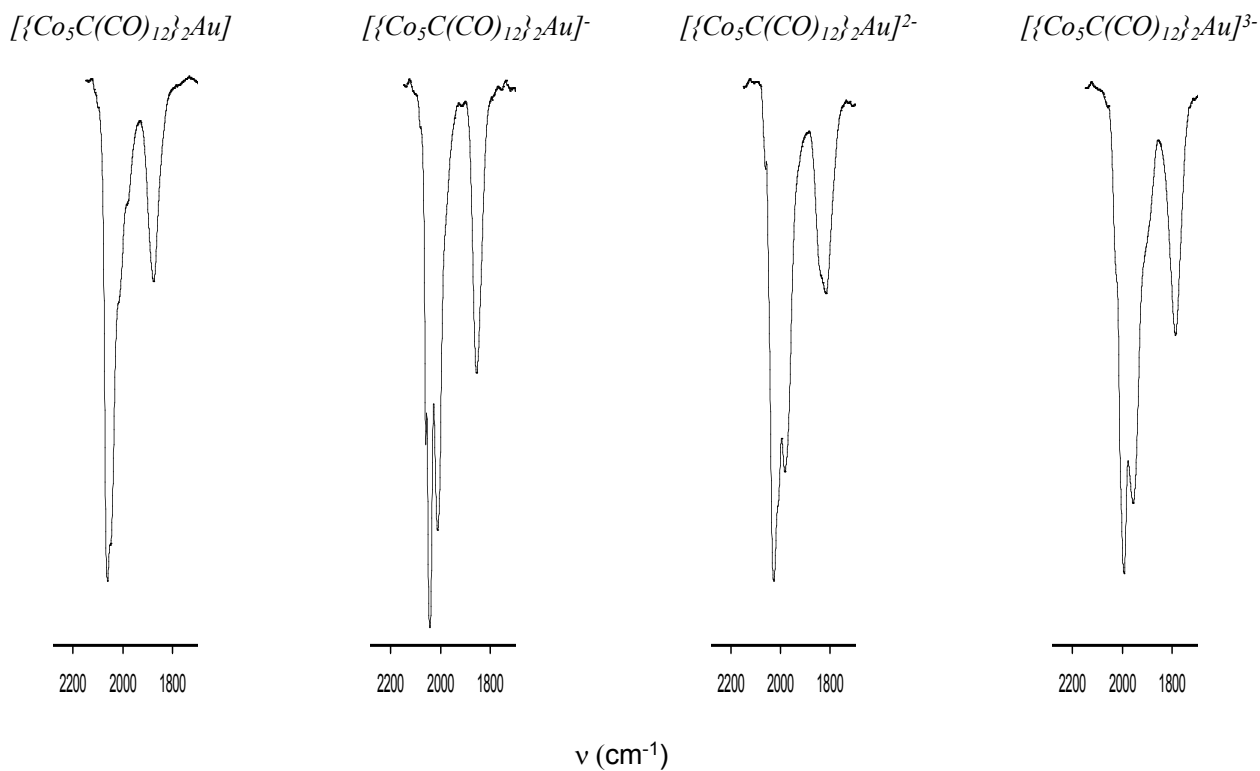

**Table S.2.**

$\nu(\text{CO})$  stretching frequencies ( $\text{cm}^{-1}$ ) of  $[\mathbf{1}]^n$  ( $n = 1-3$ ) as obtained from spectroelectrochemical experiments in  $\text{CH}_2\text{Cl}_2$  solution.

|                     |                                     |
|---------------------|-------------------------------------|
| $[\mathbf{1}]^-$    | 2030(s), 2013(m), 1973(w), 1851(m)  |
| $[\mathbf{1}]^{2-}$ | 2021(w), 1983(s), 1960(sh), 1800(m) |
| $[\mathbf{1}]^{3-}$ | 2026(w), 1918(s), 1758(m)           |

**Figure S.3**

*Selected IR spectra recorded in a OTTLE cell during the electrolysis of  $[\{\text{Co}_5\text{C}(\text{CO})_{12}\}\text{Au}\{\text{Co}(\text{CO})_4\}]^-$ , in  $\text{CH}_2\text{Cl}_2$  solution containing  $[\text{N}^n\text{Bu}_4][\text{PF}_6]$   $0.2 \text{ mol dm}^{-3}$  as the supporting electrolyte, and corresponding to the different charged clusters  $[\{\text{Co}_5\text{C}(\text{CO})_{12}\}\text{Au}\{\text{Co}(\text{CO})_4\}]^-$  /  $[\{\text{Co}_5\text{C}(\text{CO})_{12}\}\text{Au}\{\text{Co}(\text{CO})_4\}]^{2-}$  /  $[\{\text{Co}_5\text{C}(\text{CO})_{12}\}\text{Au}\{\text{Co}(\text{CO})_4\}]^{3-}$ .*

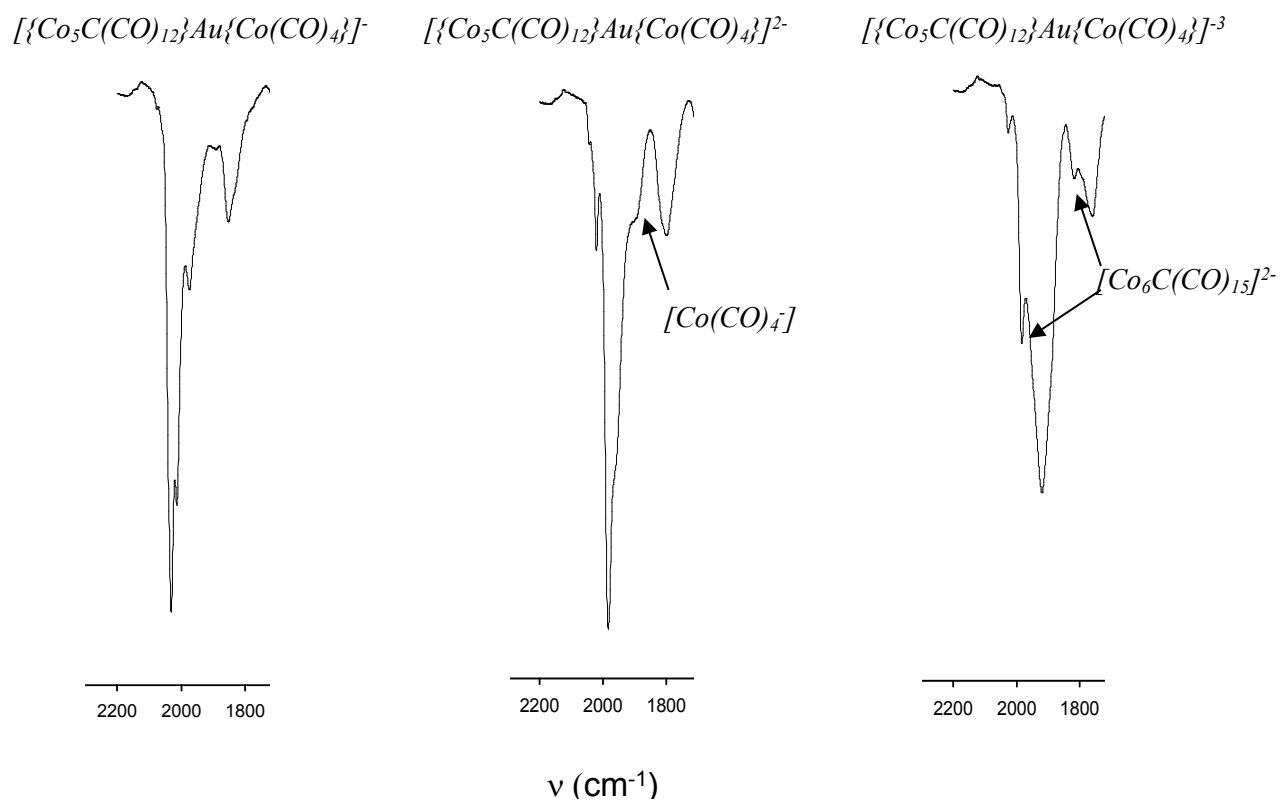

Supplement: c4dt00854e1.pdf [file c4dt00854e1.pdf]
